# Supplementary material for: Core cysteine residues in the Plasminogen-Apple-Nematode (PAN) domain are critical for HGF/c-MET signaling
Source: PubMed Central journal article supplement (PMC9249922; doi:10.1038/s42003-022-03582-8), 2022-07-01
Supplement: 42003_2022_3582_MOESM2_ESM.pdf [file 42003_2022_3582_MOESM2_ESM.pdf]

## Description of Additional Supplementary Files

**File name:** Supplementary Data 1

**Description:** Species of origin, protein identification number (ID) and functional annotation of PAN domaincontaining proteins.

**File name:** Supplementary Data 2

**Description:** GO terms exhibiting significant enrichment among 28,300 PAN domain-containing proteins.

**File name:** Supplementary Data 3

**Description:** Proteins with PAN domain in alignment.
